# Supplementary material for: Interactions between O2 Nanobubbles and the Pulmonary Surfactant in the Presence of Inhalation Medicines
Source: MDPI journal article supplement (doi:10.3390/ma15186353), 2022-09-13
Supplement: s1 [file s1]

## Supplementary Materials

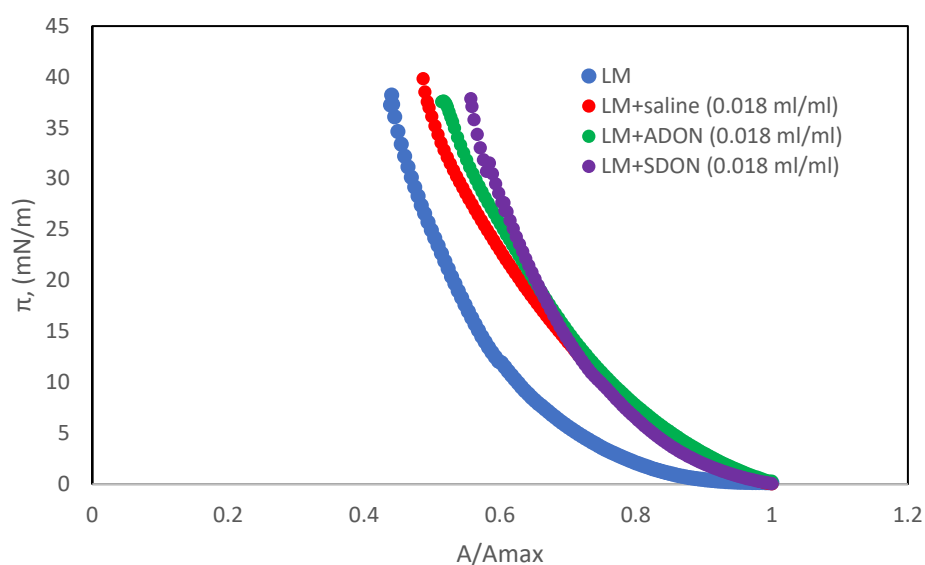

Figure S1: The surface pressure–area isotherms of mixed monolayers of LM and ADON or SDON measured at 36.6°C.

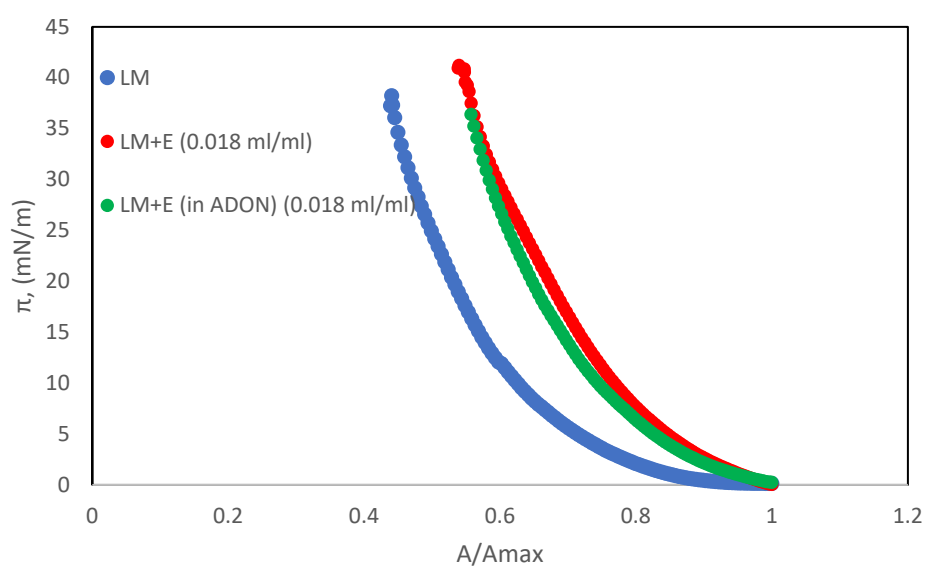

Figure S2: The surface pressure–area isotherms of monolayers of LM and ectoine in presence of ADON or SDON measured at 36.6°C.

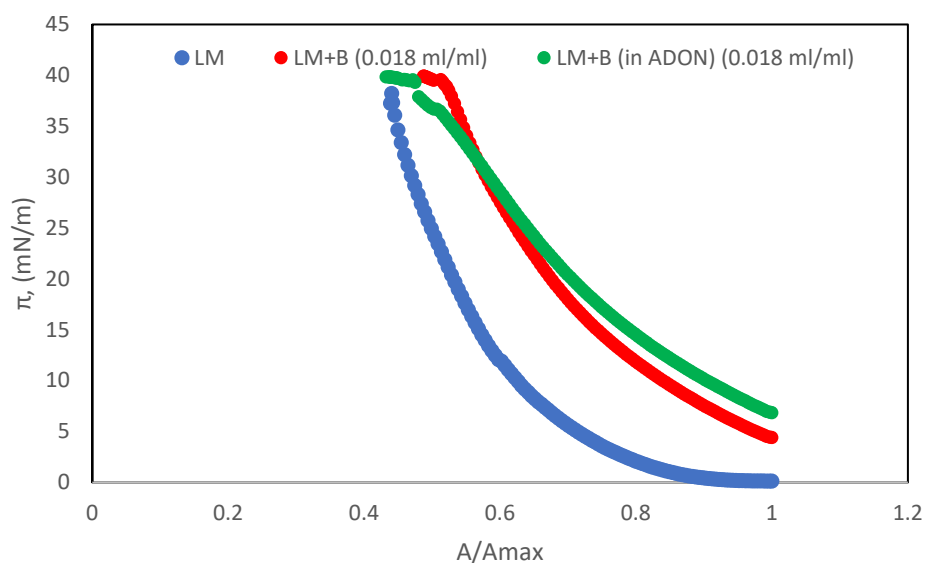

Figure S3: The surface pressure–area isotherms of monolayers of LM and budesonide drug in presence of ADON or SDON measured at 36.6°C.

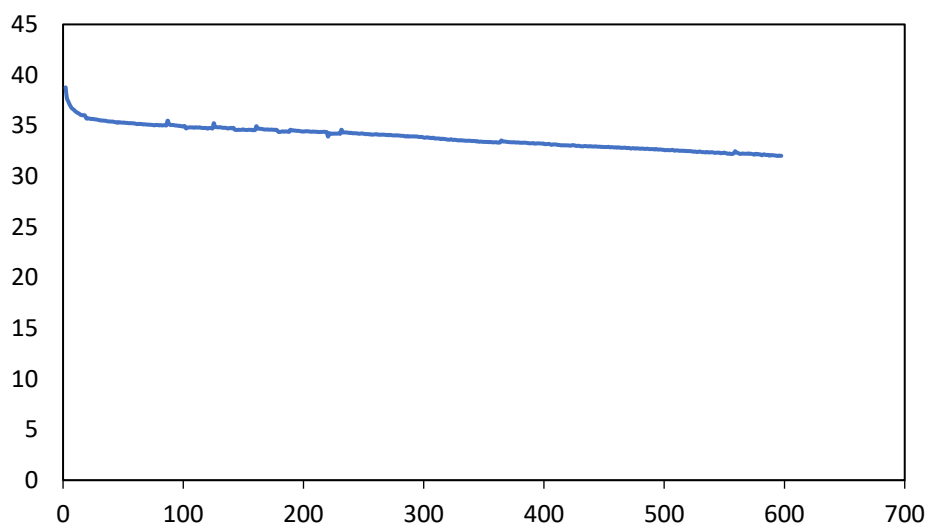

Figure S4: The time-dependent decrease in surface tension curve of MPS at constant interfacial area (at 36.6°C).
